## CORRECTION

# Correction: Bumble bees regulate their intake of essential protein and lipid pollen macronutrients

A. D. Vaudo, D. Stabler, H. M. Patch, J. F. Tooker, C. M. Grozinger and G. A. Wright

There was an error published in *J. Exp. Biol.* **219**, 3962-3970.

The x-axis and y-axis of Fig. 1 were incorrectly labelled. The corrected figure is given below.

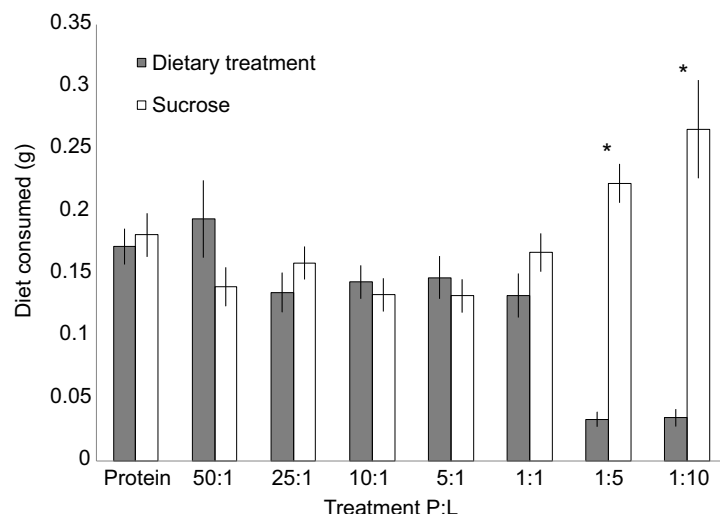

**Fig. 1. Daily consumption of diets across treatments for *B. terrestris* foragers in single P:L diet assay.** Treatments are represented by their protein:lipid (P:L) treatment diet ratio, including protein-only diets. Diets are represented as sucrose-only and diet associated with each treatment. Asterisks represent significant differences ( $P < 0.05$ ) in diet consumed within treatment.  $N=15$  bees per treatment, data presented as means  $\pm$  s.e.m.

We apologise to the authors and readers for any inconvenience this may have caused.
